# Supplementary material for: Specific modification at the C-terminal lysine residue of the green fluorescent protein variant, GFPuv, expressed in Escherichia coli
Source: PubMed Central journal article supplement (PMC6423240; doi:10.1038/s41598-019-41309-8), 2019-03-18
Supplement: 41598_2019_41309_MOESM1_ESM.pdf [file 41598_2019_41309_MOESM1_ESM.pdf]

Supplementary Information for:

**Specific modification at the C-terminal lysine residue of the green fluorescent protein variant, GFPuv, expressed in *Escherichia coli***

Takahiro Nakatani, Norihisa Yasui, Issei Tamura, Atsuko Yamashita

*Graduate School of Medicine, Dentistry and Pharmaceutical Sciences,  
Okayama University,  
1-1-1, Tsushima-naka, Kita-ku, Okayama, 700-8530, Japan*

**Corresponding Authors**

Norihisa Yasui

E-mail: [nyasui@okayama-u.ac.jp](mailto:nyasui@okayama-u.ac.jp)

Atsuko Yamashita

E-mail: [a\\_yama@cc.okayama-u.ac.jp](mailto:a_yama@cc.okayama-u.ac.jp)

**CONTENTS**

**Supplementary Figure S1.** Gel dependency of the separation of GFPuv form I and form II by SDS-PAGE.

**Supplementary Figure S2.** Estimation of the isoelectric point (pI) of GFPuv form I and form II using standard proteins.

**Supplementary Figure S3.** ESI-MS spectra of GFPuv form I and form II.

**Supplementary Figure S4.** Top-down sequencing of the H<sub>231</sub>GMDELYK<sub>238</sub> fragment of GFPuv form II using MALDI In-Source-Decay.

**Supplementary Figure S5.** Structure-based amino acid sequence alignment of GFP and its related proteins.

**Supplementary Figure S6.** The original gel images displayed on Figure 3A.

**A**

15% in-house gel

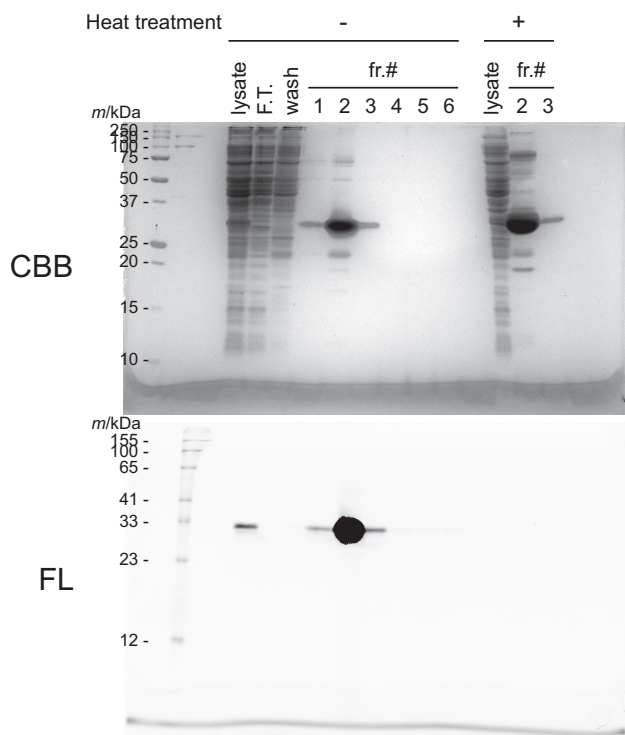**B**

SuperSep Ace 10-20% (Wako)

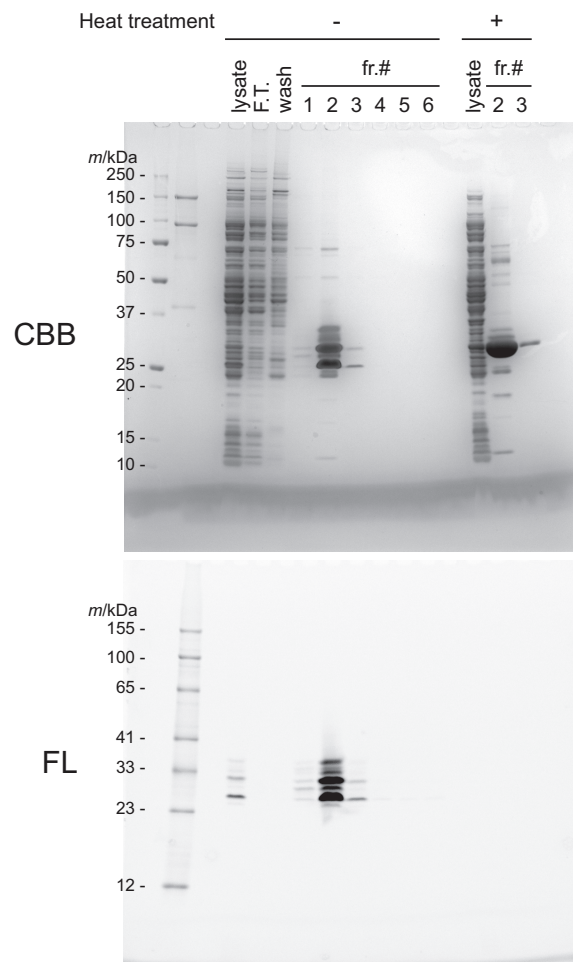

**Supplementary Figure S1.** Gel dependency of the separation of GFPuv form I and form II by SDS-PAGE. SDS-PAGE analysis of the fractions from a Ni-NTA column during the purification of HFT-GFPuv on a 15% in-house gel (A) and a precast 10–20% gradient gel (B).

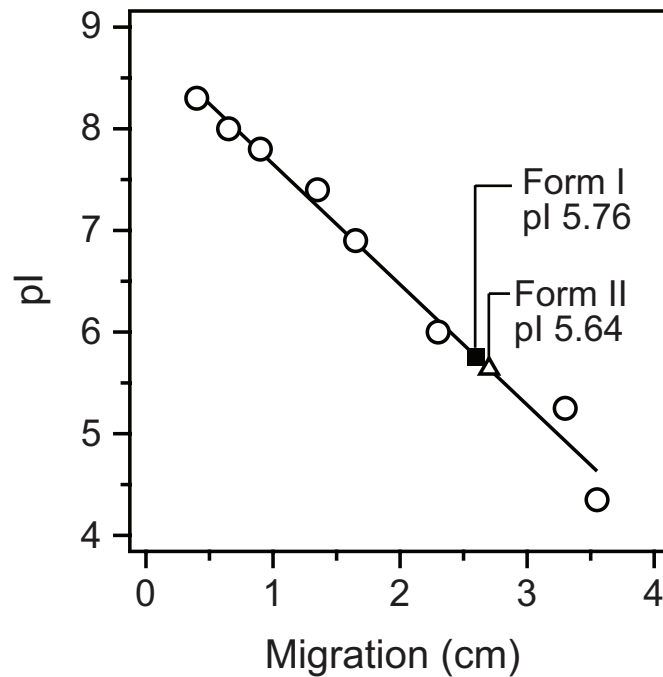

**Supplementary Figure S2.** Estimation of the isoelectric point (pI) of GFPuv form I and form II using standard proteins. pIs of the standard proteins are plotted against their migration distance from the cathode on the gel in Fig. 3C. Cytochrome c from pig heart (pI 10.7), ribonuclease A from bovine pancreas (pI 9.5), a lectin from *Lens culinaris* (pI 8.3, 8.0, 7.8), myoglobin from horse muscle (pI 7.4, 6.9), carbonic anhydrase from bovine erythrocytes (pI 6.0),  $\beta$ -lactoglobulin from bovine milk (pI 5.3, 5.2), trypsin inhibitor from soybean (pI 4.5), glucose oxidase from *Aspergillus niger* (pI 4.2), amyloglucosidase from *Aspergillus niger* (pI 3.5). The closed square and open triangle indicates the position of GFPuv form I and form II, respectively.

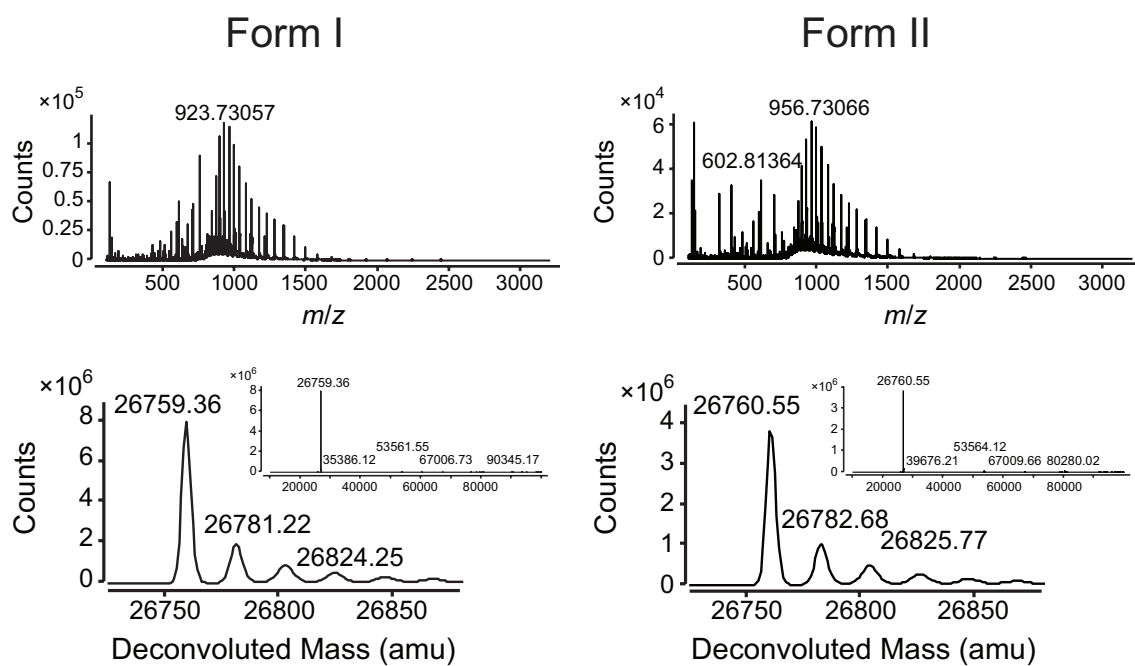

**Supplementary Figure S3.** ESI-MS spectra of GFPuv form I and form II. Mass spectra (*top*) and deconvoluted mass spectra (*bottom*) of the intact GFPuv form I and form II are shown. Estimated mass values of form I and form II are 26759.36 and 26760.55, respectively.

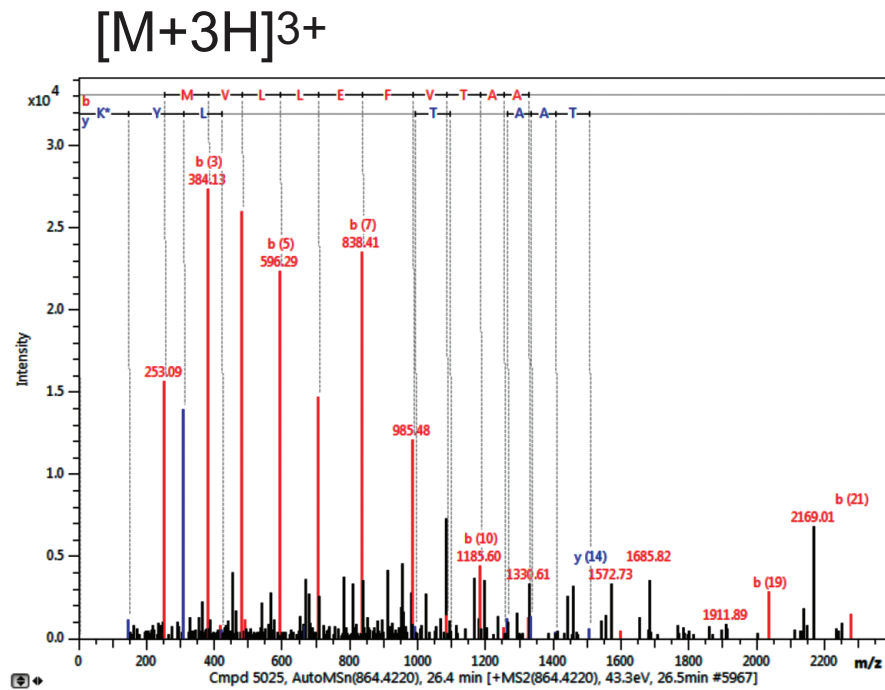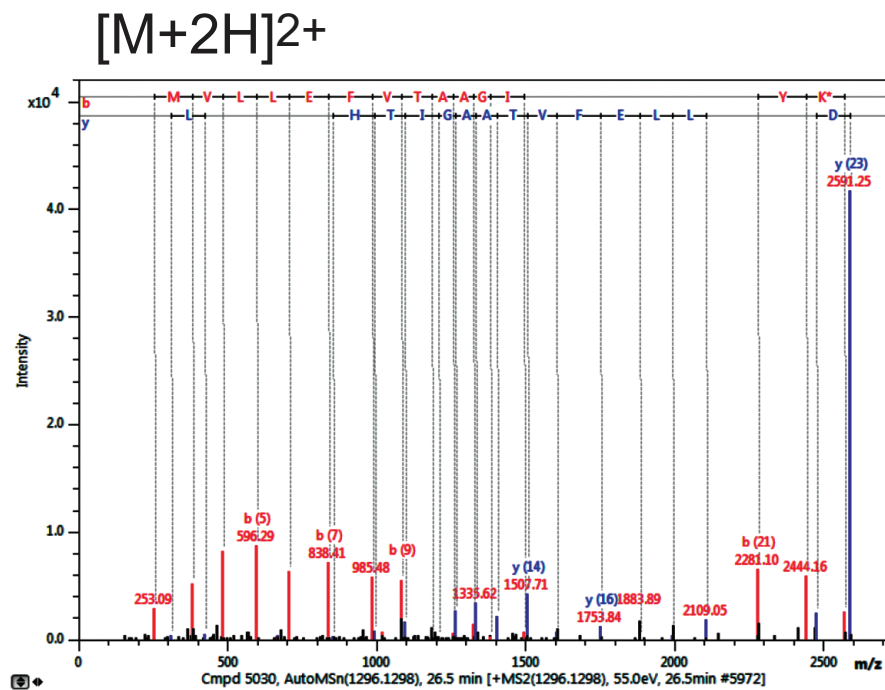

**Supplementary Figure S4.** Top-down sequencing of the H<sub>231</sub>GMDELYK<sub>238</sub> fragment of GFPuv form II using MALDI In-Source-Decay. Mass spectra for [M+3H]<sup>3+</sup> (top) and [M+2H]<sup>2+</sup> (bottom) ions are shown. Identified b-ions (red) and y-ions (blue), as well as unidentified signals (black), are indicated in the spectra.

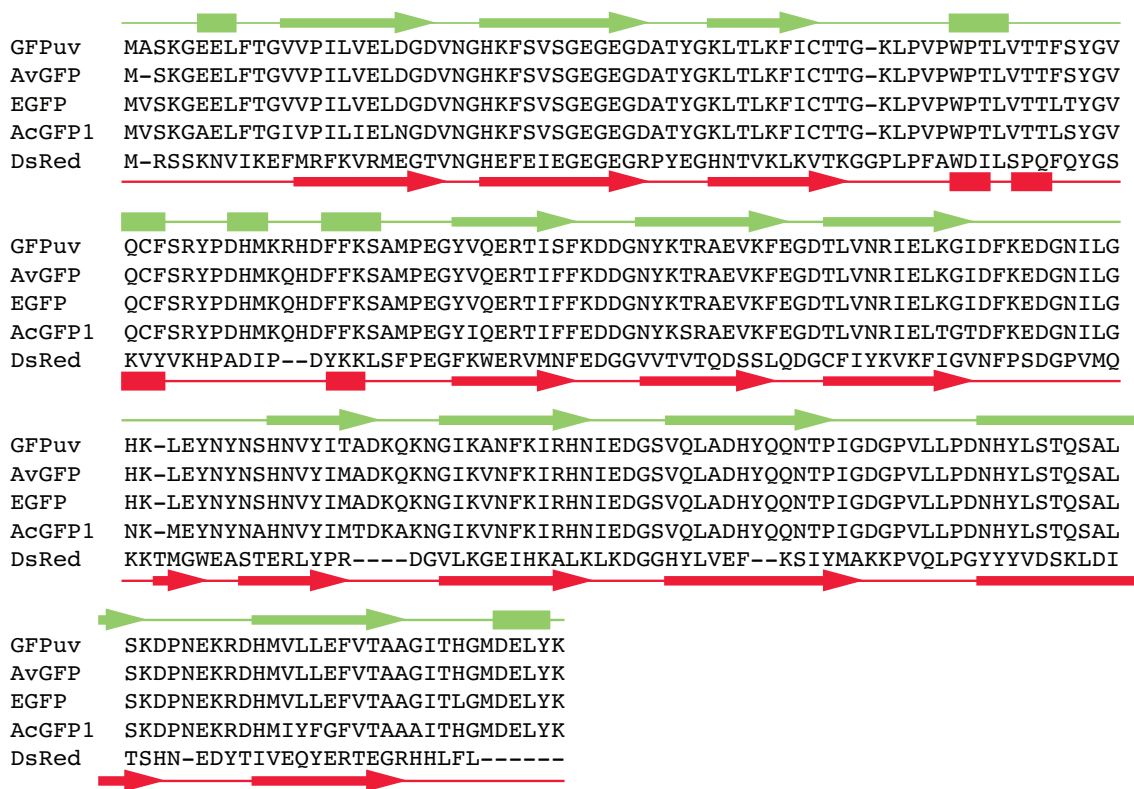

**Supplementary Figure S5.** Structure-based amino acid sequence alignment of GFP and its related proteins. AvGFP and AcGFP are derived from *Aequorea victoria* and *Aequorea coerulea*, respectively. UniProtKB accession numbers are as follows: AvGFP (P42212), EGFP (C5MKY7), and DsRed (Q9U6Y8). The GenBank accession number of GFPuv is AAC53663.1. The sequence of AcGFP was obtained from Clontech Laboratories Inc. (<http://www.clontech.com>). The sequences were aligned with the PROMALS3D multiple sequence and structure alignment server<sup>1</sup> based on the structures of GFPuv (PDB ID: 1B9C) and DsRed (PDB ID: 1GGX).

## CBB

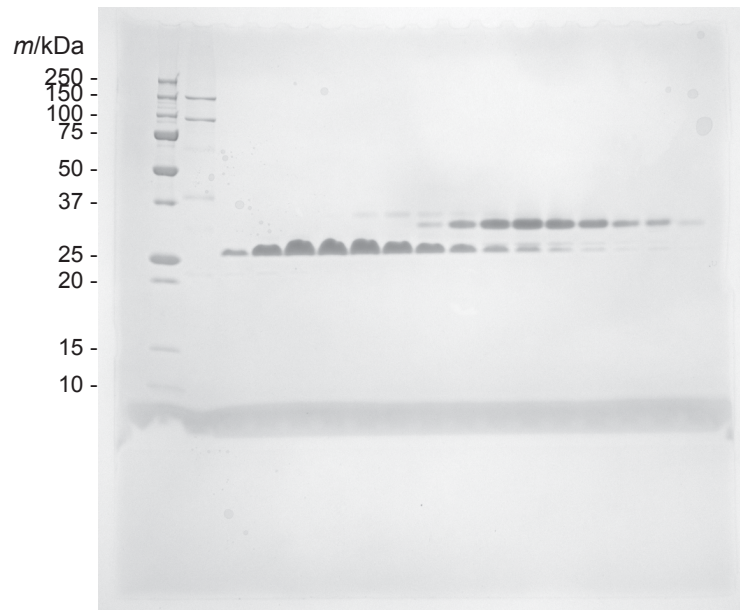

## FL

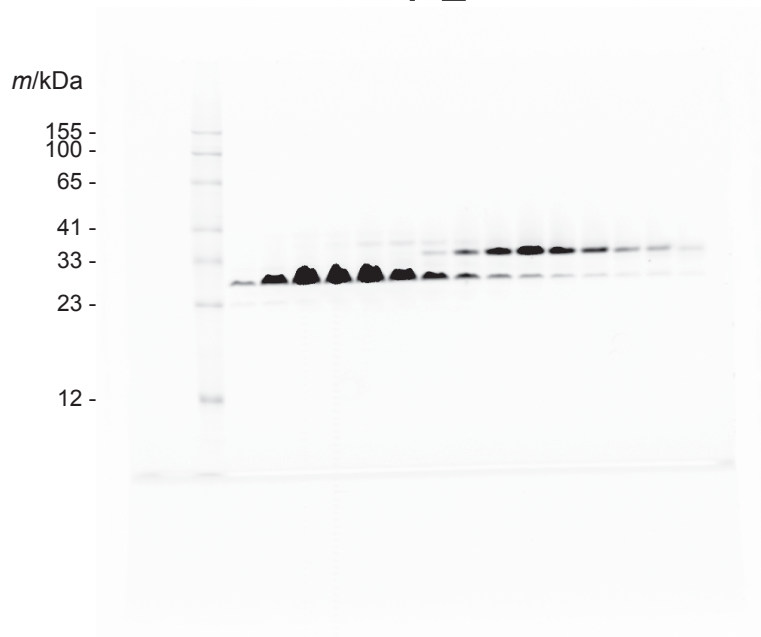

**Supplementary Figure S6.** The original gel images displayed on Figure 3A. Fluorescent bands (*bottom*) were visualized under ultraviolet light without any staining processes. After the detection of the fluorescent signal, the same gel was stained with CBB (*top*).

## Reference for Supplementary Information

- 1 Pei, J., Kim, B. H. & Grishin, N. V. PROMALS3D: a tool for multiple protein sequence and structure alignments. *Nucleic acids research* **36**, 2295-2300, doi:10.1093/nar/gkn072 (2008).
